# Supplementary material for: Fate of adsorbed arsenic during early stage sulfidization of nano-ferrihydrite
Source: Royal Society of Chemistry journal article supplement (doi:10.1039/c9en00436j), 2019-01-01
Supplement: c9en00436j1.pdf [file c9en00436j1.pdf]

## Supporting information for

### Fate of adsorbed arsenic during early stage sulfidization of nano-ferrihydrite

Guoqing Zhang,<sup>ab</sup> Danni Zhang,<sup>a</sup> Zidan Yuan,<sup>a</sup> Xu Ma,<sup>ab</sup> Lei Lei,<sup>ab</sup> Xing Wu,<sup>a</sup> Jinru Lin,<sup>a</sup> Xin Wang,<sup>a</sup> Shaofeng Wang,<sup>\*a</sup> Yongfeng Jia<sup>a</sup>

<sup>a</sup> Key Laboratory of Pollution Ecology and Environmental Engineering, Institute of Applied Ecology, Chinese Academy of Sciences, Shenyang 110016, China

<sup>b</sup> University of the Chinese Academy of Sciences, Beijing 100049, China

\* Corresponding author: Tel.: +86 24 83970502, E-mail address:

[wangshaofeng@iae.ac.cn](mailto:wangshaofeng@iae.ac.cn)

Pages: 5  
Tables: 3  
Figures: 1

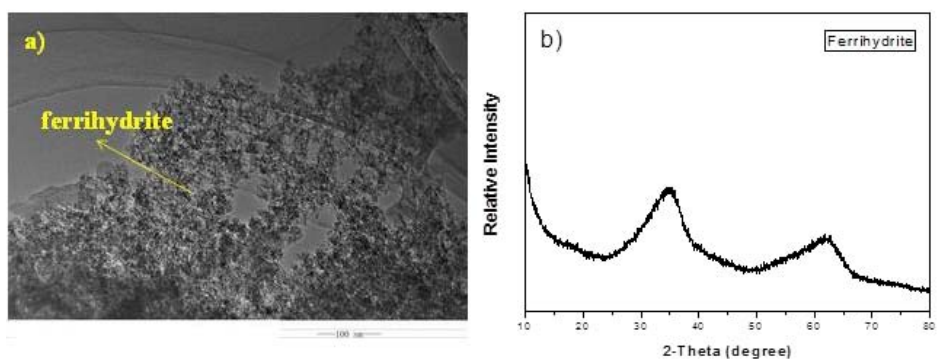

Figure. S1 TEM image (a) and XRD pattern (b) of nano-ferrihydrate

**Table S1: Results of Phase identification and semi-quantitative Rietveld refinement for phase analysis of As-free and As(III)-adsorbed Fhy in presence of 0.5 mM S(-II) at different Fe/As molar ratios after 15 day reaction.**

|                | Gt % | Lp % | Fhy% | Rexp | Rwp   |
|----------------|------|------|------|------|-------|
| As free        | 100  | 0    | 0    | 4.8  | 16.05 |
| Fe/As(V) 500   | 100  | 0    | 0    | 4.63 | 13.76 |
| Fe/As(V) 100   | 2.9  | 85.8 | 11.3 | 4.31 | 18.6  |
| Fe/As(V) 50    | 0.2  | 64.8 | 35   | 4.4  | 18.56 |
| Fe/As(III) 500 | 99.5 | 0    | 0.5  | 4.51 | 16.26 |
| Fe/As(III) 100 | 99.6 | 0    | 0.4  | 4.52 | 11.38 |
| Fe/As(III) 50  | 79.5 | 16.8 | 3.8  | 4.45 | 14.01 |

### **Phase identification and semi-quantitative Rietveld refinement**

Phase identification and semi-quantitative Rietveld refinement for phase analysis was conducted with X'pert HighScore Plus software using the PAN-Inorganic and Mineral Crystal Structure Database version 2.0.23 (Table S1). In all cases, the iron oxyhydroxide used for analysis (with JCPDS #) were: 2-line Fhy (98-011-1017),<sup>1</sup> goethite (98-011-2696),<sup>2</sup> and lepidocrocite (98-006-5118).<sup>3</sup> The semi-quantitative Rietveld phase conducted with the X'pert HighScore Plus software was tested for validity by analyzing a reagent grade goethite standard and refining the XRD data with unlikely multiple phases with diffraction peaks in all regions. Rietveld analysis (accuracy of  $\leq 5\%$ ) confirmed the major phase in the test samples.

**Table S2: Results of linear combination fits (LCF) for S-K-edge XANES spectra following reaction As-free and As(III)-adsorbed Fhy in presence of 0.5 mM S(-II) at different Fe/As molar ratios.**

|                     | FeS | S <sup>0</sup> | As <sub>2</sub> S <sub>3</sub> | Na <sub>2</sub> SO <sub>3</sub> | NaS <sub>2</sub> O <sub>3</sub> | Na <sub>2</sub> SO <sub>4</sub> | R-factor |
|---------------------|-----|----------------|--------------------------------|---------------------------------|---------------------------------|---------------------------------|----------|
| As free-0.25d       | 0   | 10.7           | 0                              | 17.5                            | 46.9                            | 24.9                            | 0.0158   |
| As free-1d          | 0   | 0              | 0                              | 5.8                             | 43.5                            | 50.7                            | 0.0220   |
| As free-15d         | 0   | 0              | 0                              | 16.1                            | 18.6                            | 65.3                            | 0.0061   |
| Fe/As(V)500-0.25d   | 0   | 2.8            | 0                              | 15.1                            | 50.6                            | 31.4                            | 0.0137   |
| Fe/As(V)500-1d      | 0   | 0              | 0                              | 12.7                            | 33.9                            | 53.4                            | 0.0142   |
| Fe/As(V)500-15d     | 0   | 0              | 0                              | 18.8                            | 19.6                            | 61.6                            | 0.0142   |
| Fe/As(V)100-0.25d   | 0   | 8.2            | 0                              | 11.7                            | 47.7                            | 32.7                            | 0.0141   |
| Fe/As(V)100-1d      | 0   | 0              | 0                              | 4                               | 32                              | 64.1                            | 0.0113   |
| Fe/As(V)100-15d     | 0   | 0              | 0                              | 0                               | 21.2                            | 78.8                            | 0.0107   |
| Fe/As(V)50-0.25d    | 0   | 2.8            | 0                              | 12.4                            | 51.5                            | 33.3                            | 0.0141   |
| Fe/As(V)50-1d       | 0   | 0              | 0                              | 8.1                             | 42.1                            | 49.8                            | 0.0159   |
| Fe/As(V)50-15d      | 0   | 0              | 0                              | 0                               | 12                              | 88                              | 0.0053   |
| Fe/As(III)500-0.25d | 0   | 0              | 4.5                            | 17.5                            | 50.1                            | 27.9                            | 0.0184   |
| Fe/As(III)500-1d    | 0   | 0              | 0                              | 17.1                            | 18.8                            | 64.1                            | 0.0140   |
| Fe/As(III)500-15d   | 0   | 0              | 0                              | 17.7                            | 16                              | 66.3                            | 0.0153   |
| Fe/As(III)100-0.25d | 0   | 0              | 8.5                            | 15.8                            | 62.4                            | 13.3                            | 0.0297   |
| Fe/As(III)100-1d    | 0   | 0              | 0                              | 8.9                             | 69.2                            | 21.9                            | 0.0269   |
| Fe/As(III)100-15d   | 0   | 0              | 6.6                            | 9.1                             | 13.2                            | 71                              | 0.0640   |
| Fe/As(III)50-0.25d  | 0   | 0              | 27.7                           | 9.4                             | 62.1                            | 0.8                             | 0.0349   |
| Fe/As(III)50-1d     | 0   | 0              | 15.3                           | 6.3                             | 73.9                            | 4.5                             | 0.0747   |
| Fe/As(III)50-15d    | 0   | 0              | 25.9                           | 6.9                             | 54.9                            | 12.3                            | 0.0873   |

**Table S3: Results of linear combination fits (LCF) for As-K-edge XANES spectra following reaction As-free and As(III)-adsorbed Fhy in presence of 0.5 mM S(-II) at different Fe/As molar ratios.**

|                   | As(V) | As(III) | R-factor |
|-------------------|-------|---------|----------|
| Fe/As(V)50-15d    | 100   | 0       | 0.1094   |
| Fe/As(III)100-1d  | 30.4  | 69.6    | 0.0082   |
| Fe/As(III)100-15d | 45.7  | 54.3    | 0.0410   |
| Fe/As(III)50-1d   | 31.5  | 68.5    | 0.0126   |
| Fe/As(III)50-15d  | 50.7  | 49.3    | 0.0479   |

### References

1. F. M. Michel, L. Ehm, S. M. Antao, P. L. Lee, P. J. Chupas, G. Liu, D. R. Strongin, M. A. Schoonen, B. L. Phillips and J. B. Parise, The structure of ferrihydrite, a nanocrystalline material, *Science*, 2007, **38**, 1726-1729.
2. V. S. Coker, A. M. T. Bell, C. I. Pearce, R. A. D. Patrick, G. van der Laan and J. R. Lloyd, Time-resolved synchrotron powder X-ray diffraction study of magnetite formation by the Fe(III)-reducing bacterium *Geobacter sulfurreducens*, *American Mineralogist*, 2008, **93**, 540-547.
3. A. P. Zhukhlistov, Crystal structure of lepidocrocite FeO(OH) from the electron-diffractometry data, *Crystallography Reports*, 2001, **46**, 730-733.
